# Supplementary material
Source: Springer Nature journal article supplement (https://www.springermedizin.de/resource/supplementary/12943_2010_715_MOESM5_ESM.pdf/9554644)

**A**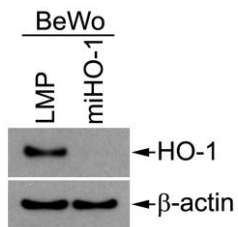**B**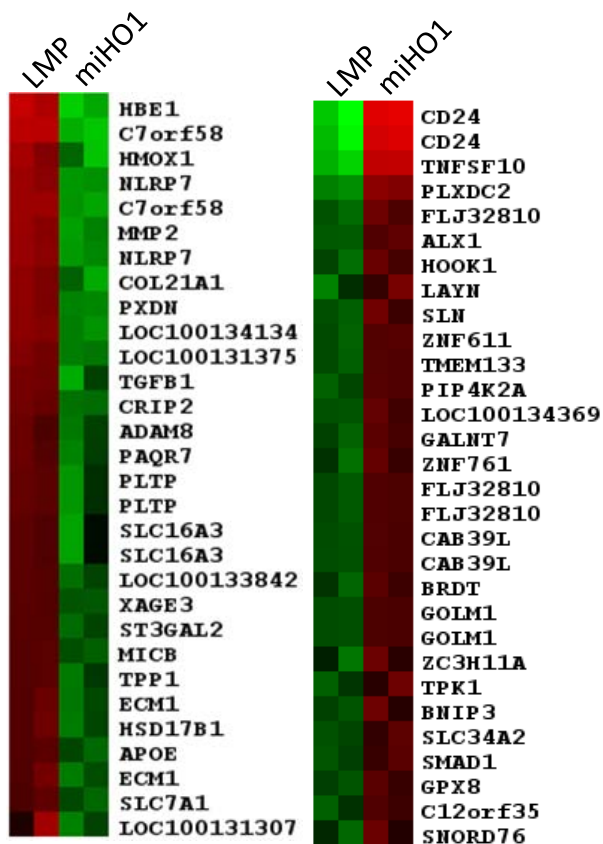**C**

| Gene set name                | Source     | Size | NES  | Nominal P-value | FDR  |
|------------------------------|------------|------|------|-----------------|------|
| EXTRACELLULAR_REGION         | GO:0005576 | 22   | 2,63 | <0.001          | 0,00 |
| EXTRACELLULAR_REGION_PART    | GO:0044421 | 15   | 2,05 | <0.001          | 0,13 |
| EXTRACELLULAR_SPACE          | GO:0005615 | 10   | 1,80 | 0,02            | 0,30 |
| RECEPTOR_BINDING             | GO:0005102 | 16   | 1,79 | 0,02            | 0,25 |
| CATION_BINDING               | GO:0043169 | 13   | 1,78 | 0,02            | 0,23 |
| INTEGRAL_TO_PLASMA_MEMBRANE  | GO:0005887 | 45   | 1,71 | 0,03            | 0,27 |
| TRANSITION_METAL_ION_BINDING | GO:0046914 | 11   | 1,65 | 0,03            | 0,33 |
| ION_BINDING                  | GO:0043167 | 16   | 1,60 | 0,04            | 0,38 |
| SYSTEM_DEVELOPMENT           | GO:0048731 | 39   | 1,54 | 0,04            | 0,43 |
| MEMBRANE_FRACTION            | GO:0005624 | 20   | 1,48 | 0,05            | 0,44 |

**D**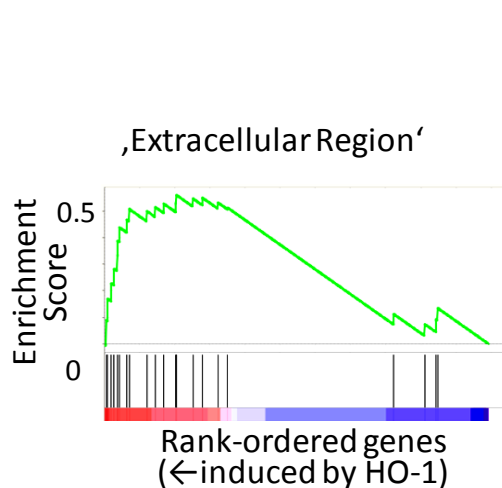**E**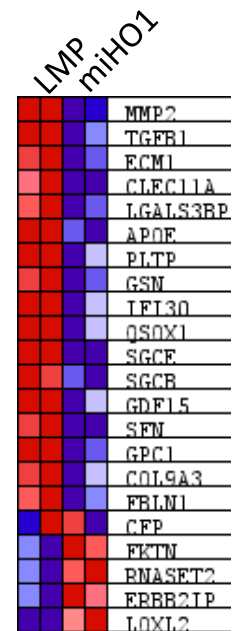

Supplement: MOESM5 [file 9554644]
